# Supplementary material for: A highly durable textile-based sensor as a human-worn material interface for long-term multiple mechanical deformation sensing
Source: Royal Society of Chemistry journal article supplement (doi:10.1039/c9tc04006d), 2019-01-01
Supplement: c9tc04006d1.pdf [file c9tc04006d1.pdf]

## Supporting Information

### **Highly durable textile-based sensor as human-worn material interface for long-term multiple mechanical deformation sensing**

Ben Niu,<sup>a</sup> Tao Hua <sup>\*a</sup>, Haibo Hu,<sup>b</sup> Bingang Xu,<sup>a</sup> Xiao Tian,<sup>a</sup> Kahei Chan,<sup>a</sup> Shun Chen <sup>a</sup>

*<sup>a</sup>Nanotechnology Center, Institute of Textiles & Clothing, The Hong Kong Polytechnic University, Hung Hom, Kowloon, 999077, Hong Kong, China. E-mail: tao.hua@polyu.edu.hk*

*<sup>b</sup>School of Physics and Materials Science, Anhui University, Hefei, 230000, China*

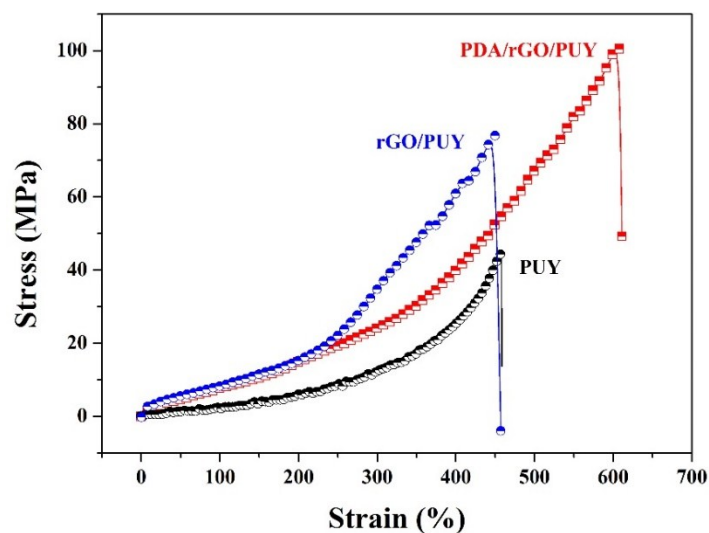

**Fig. S1** The tensile stress versus strain curves of the PUY, rGO/PUY, and PDA/rGO/PUY obtained through the testing by using the machine of Instron 5944, with the gauge length of 10 cm and testing speed of 100 mm min<sup>-1</sup>.

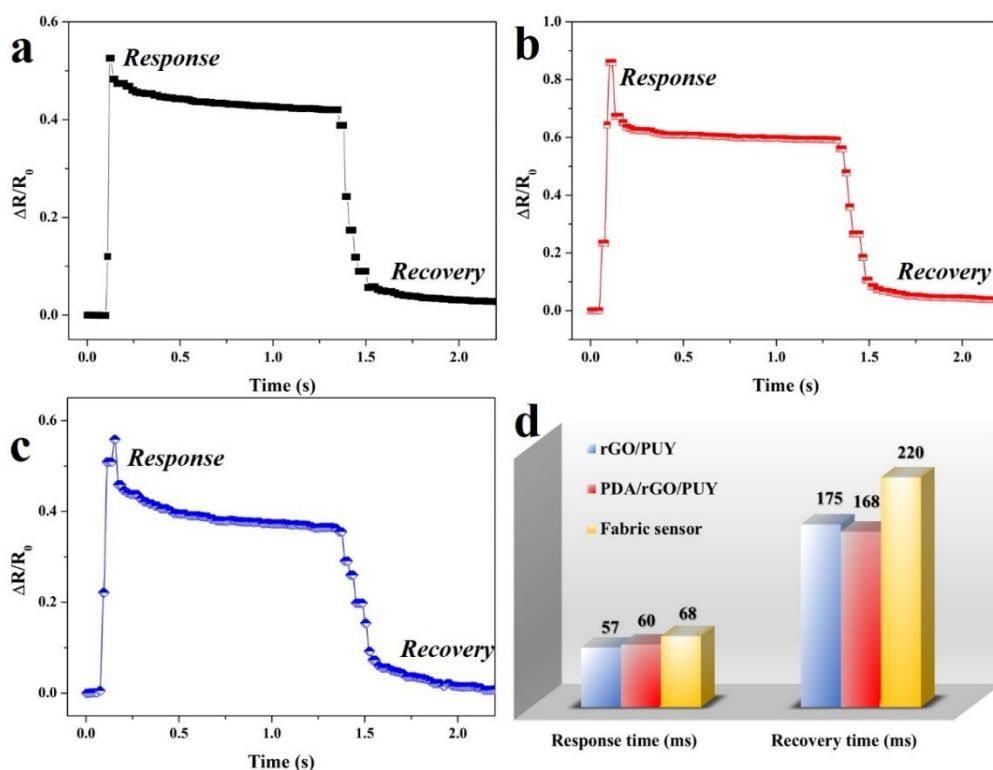

**Fig. S2** The response and recovery curves of (a) rGO/PUY, (b) PDA/rGO/PUY, and (c) fabric sensors under a small strain of 5% and a testing speed of 600 mm/min. (d) Comparison of the response and recovery time between the three sensors.

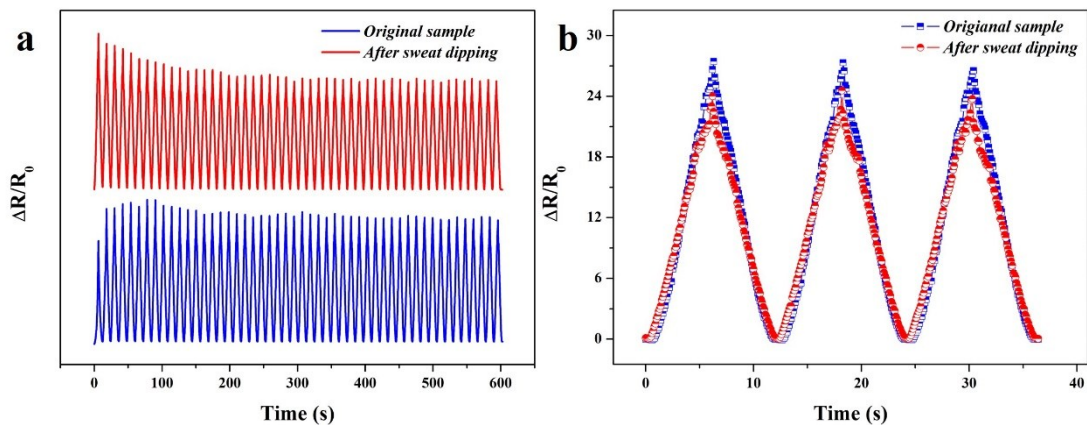

**Fig. S3** Electro-mechanical curves of the sensing yarn before and after sweat dipping. (a) 50 cycles. (b) 3 cycles. (For the effect of sweat, the sensing yarn was dipped into an artificial sweat (pH 8.0) for 30 min at room temperature, and then the sensor was cleaned by deionized water and fully dried in the air.)

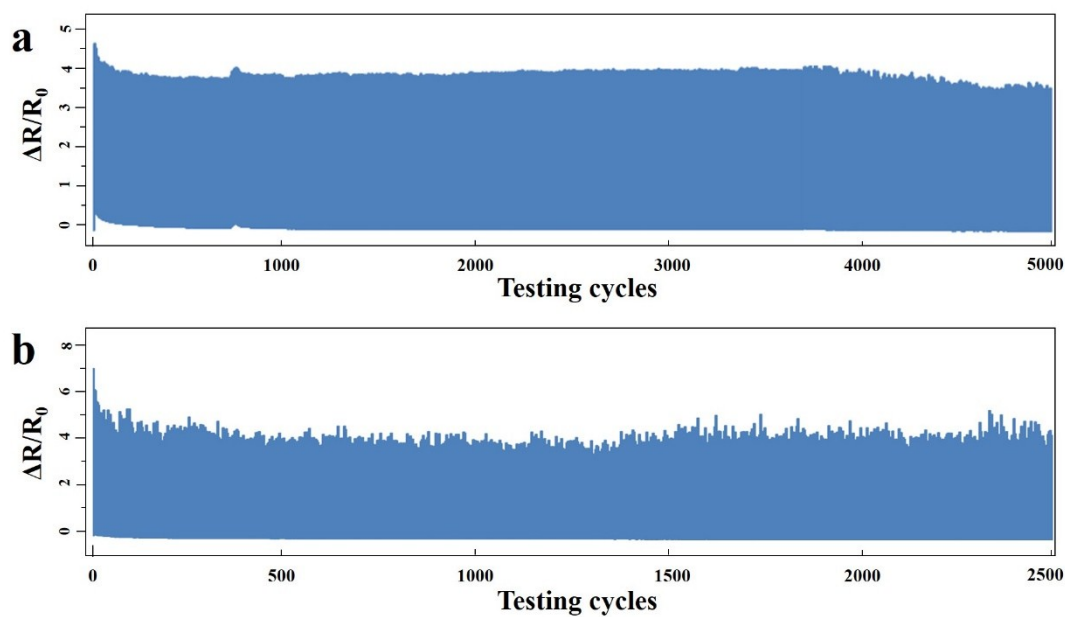

**Fig. S4** Cyclic stability test of compressive bending of the sensing (a) yarn and (b) fabric under the displacement of moving pressure head of 10 mm and the movement speed of pressure head of 100  $\text{mm min}^{-1}$ .

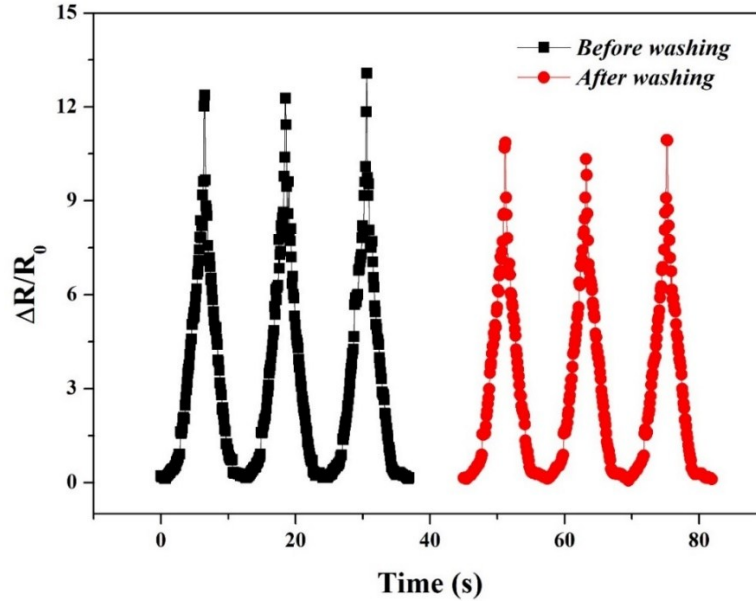

**Fig. S5** Washability of the sensing fabric. (The sensing fabric was firstly soaked into the detergent solution for 2 min, where the solution contains 0.2 wt.% of 1993 AATCC Standard Reference Detergent. Then the solution was stirred at 27 °C and 200 r.p.m for 5 min to simulate the washing process. Thereafter, the sensing fabric was rinsed by cleaned water and fully dried in the ventilated hood at room temperature.)

**Table. S1** Performance comparisons to recently reported 1D strain sensors

| Materials                          | GF@strain                  | Durability<br>(cycles@strain) | Linearity            | Hysteresis | Weav-<br>ability | Sensing function                       | Ref          |
|------------------------------------|----------------------------|-------------------------------|----------------------|------------|------------------|----------------------------------------|--------------|
| PDA/rGO/PU                         | 50.0@50%                   | 30000@50%                     | High                 | Low        | High             | Tension,<br>Bending induced<br>tension | This<br>work |
| rGO/(PU/PE)                        | 10@1%<br>3.7@50%           | 10000@30/50%                  | Nonlinear            | High       | N/A              | Tension, bending,<br>torsion           | S1           |
| CNTs/PU                            | 1.67@0-20%<br>1.24@20-100% | 2000@50%                      | Nonlinear            | N/A        | N/A              | Tension                                | S2           |
| AgNWs/<br>Polyolefin               | 13920@64%                  | 4500@10%                      | Nonlinear            | N/A        | N/A              | Tension                                | S3           |
| CNTs/PU                            | 5@1500%                    | 10@400%                       | Nonlinear            | N/A        | N/A              | Tension                                | S4           |
| (CB/PDMS)-<br>(AgNWs/nylon&<br>PU) | ~2.8@20%<br>~0.7@100%      | N/A                           | Two linear<br>ranges | Low        | high             | Tension, flexion,<br>pressure          | S5           |
| PEDOT/PE                           | 0.76@20%                   | 1000@20%                      | Nonlinear            | N/A        | N/A              | Tension, pressure                      | S6           |

**Note:**

GF: gauge factor; rGO: reduced graphene oxide; PU: polyurethane; PE: polyester; CNTs: carbon nanotubes; AgNWs: Ag nanowires; CB: carbon black; PDMS: polydimethylsiloxane; GWF: graphene woven fabric; PEDOT: poly(3,4-ethylenedioxythiophene)

**Table. S2** Performance comparisons to related state of the art 2D textile-based strain sensors

| Materials                    | Fabrication method     | GF@strain                             | Durability (cycles@strain) | Linearity         | Hysteresis                       | Effects on textile | Capability for long-term use | Ref       |
|------------------------------|------------------------|---------------------------------------|----------------------------|-------------------|----------------------------------|--------------------|------------------------------|-----------|
| (PDA/rGO/PU) /elastic fabric | Weaving                | 25.3@50%                              | 10000@50%                  | High              | Low                              | Little             | High                         | This work |
| CNT/Spandex                  | Knitting               | 0.25@100%                             | 1000@100%                  | High              | Low                              | Low                | N/A                          | S7        |
| PPy/nylon lycra fabric       | In situ polymerization | ~ -3.3@20%<br>~ -0.7@60%              | N/A                        | Nonlinear         | Low                              | Low                | N/A                          | S8        |
| PEDOT:PSS/PU                 | Wet-spinning knitting  | ~ -0.7@50%<br>~ -0.3@200%             | 500@100%                   | Nonlinear         | N/A                              | High               | N/A                          | S9        |
| Carbonized silk/Ecoflex      | Carbonization          | 5.8@0-1%<br>9.6@250%<br>37.5@250-500% | 6000@100%                  | Two linear ranges | Low                              | High               | Low                          | S10       |
| Ag ink/PU                    | Printing               | ~13.3@30%                             | 1000@30%                   | Nonlinear         | Differ with different structures | Low                | N/A                          | S11       |
| Pen ink/cupra fabrics        | Dip-coating            | 2.63@23%                              | 5@2-4%                     | High              | Low                              | Low                | N/A                          | S12       |
| rGO/PE                       | Dip-coating reduction  | -1.7@15%<br>-26@8%                    | 500@7.5/5%                 | High              | Low                              | High               | N/A                          | S13       |
| GWF/PDMS                     | CVD                    | 500@2%<br>10000@8%                    | 1000@2%                    | Nonlinear         | N/A                              | High               | Low                          | S14       |
| rGO/ (nylon & PU)            | Dip-coating reduction  | 18.5@10%<br>12.1@10-18%               | 120@3%                     | Linear below 10%  | Low                              | Low                | N/A                          | S15       |

**Note:**

CVD: chemical vapor deposition; PPy: polypyrrole; PSS: poly(styrenesulfonate);

**Table. S3** Specifications of the sensing sateen fabric.

| Weave repeat | Yarn count (Ne) |      | Fabric density (Threads cm <sup>-1</sup> ) |      | Fabric cover factor (%) |      |       |
|--------------|-----------------|------|--------------------------------------------|------|-------------------------|------|-------|
|              | Warp            | Weft | Warp                                       | Weft | Warp                    | Weft | Total |
| 8 × 8        | 80/2            | 21   | 32                                         | 27   | 45                      | 50.2 | 73    |

## References

- S1 Y. Cheng, R. Wang, J. Sun, L. Gao, *Adv. Mater.* 2015, 27, 7365-7371.
- S2 Y. Li, B. Zhou, G. Zheng, X. Liu, T. Li, C. Yan, C. Cheng, K. Dai, C. Liu, C. Shen, *J. Mater. Chem. C* 2018, 6, 2258-2269.
- S3 W. Zhong, C. Liu, C. Xiang, Y. Jin, M. Li, K. Liu, Q. Liu, Y. Wang, G. Sun, D. Wang, *ACS Appl. Mater. Interfaces* 2017, 9, 42058-42066.
- S4 Q. Fan, Z. Qin, S. Gao, Y. Wu, J. Pionteck, E. Mäder, M. Zhu, *Carbon* 2012, 50, 4085-4092.
- S5 J. Ge, L. Sun, F. R. Zhang, Y. Zhang, L. A. Shi, H. Y. Zhao, H. W. Zhu, H. L. Jiang, S. H. Yu, *Adv. Mater.* 2016, 28, 722-728.
- S6 J. Eom, R. Jaisutti, H. Lee, W. Lee, J.-S. Heo, J.-Y. Lee, S. K. Park, Y.-H. Kim, *ACS Appl. Mater. Interfaces* 2017, 9, 10190-10197.
- S7 J. Foroughi, G. M. Spinks, S. Aziz, A. Mirabedini, A. Jeiranikhameneh, G. G. Wallace, M. E. Kozlov, R. H. Baughman, *ACS nano* 2016, 10, 9129-9135.
- S8 J. Wu, D. Zhou, C. O. Too, G. G. Wallace, *Synth. Met.* 2005, 155, 698-701.
- S9 S. Seyedin, S. Moradi, C. Singh, J. M. Razal, *Appl. Mater. Today* 2018, 11, 255-263.
- S10 C. Wang, X. Li, E. Gao, M. Jian, K. Xia, Q. Wang, Z. Xu, T. Ren, Y. Zhang, *Adv. Mater.* 2016, 28, 6640-6648.
- S11 T. G. La, S. Qiu, D. K. Scott, R. Bakhtiari, J. W. Kuziek, K. E. Mathewson, J. Rieger, H. J. Chung, *Adv. Healthc. Mater.* 2018, 7, 1801033.
- S12 S. Bi, L. Hou, H. Zhao, L. Zhu, Y. Lu, *J. Mater. Chem. A* 2018, 6, 16556-16565.
- S13 Z. Yang, Y. Pang, X.-l. Han, Y. Yang, J. Ling, M. Jian, Y. Zhang, Y. Yang, T.-L. Ren, *ACS nano* 2018, 12, 9134-9141.
- S14 T. Yang, W. Wang, H. Zhang, X. Li, J. Shi, Y. He, Q.-s. Zheng, Z. Li, H. Zhu, *ACS nano* 2015, 9, 10867-10875.
- S15 G. Cai, M. Yang, Z. Xu, J. Liu, B. Tang, X. Wang, *Chem. Eng. J.* 2017, 325, 396-403.
